# Supplementary material for: Ring-opening metathesis polymerization of cyclooctene derivatives with chain transfer agents derived from glycerol carbonate
Source: Royal Society of Chemistry journal article supplement (doi:10.1039/c3py01639k), 2014-01-01
Supplement: c3py01639k.pdf [file c3py01639k.pdf]

## **Electronic Supplementary Information**

### **Ring-Opening Metathesis Polymerization of Cyclooctene Derivatives with Chain Transfer Agents derived from Glycerol Carbonate**

Abdou K. Diallo, Liana Annunziata, Stéphane Fouquay, Guillaume Michaud, Frédéric Simon,  
Jean-Michel Brusson, Sophie M. Guillaume and Jean-François Carpentier

### Table of contents

|                                                                                                                                                                                                                                           |     |
|-------------------------------------------------------------------------------------------------------------------------------------------------------------------------------------------------------------------------------------------|-----|
| <b>Figure S1.</b> FT-IR spectrum (ATR) of an $\alpha,\omega$ -di( <b>GC</b> )-PCOE synthesized in the presence of <b>1</b>                                                                                                                | S5  |
| <b>Figure S2.</b> $^1\text{H}$ NMR spectrum ( $\text{CDCl}_3$ , 500 MHz, 298 K) of an $\alpha,\omega$ -di( <b>GC</b> )-PCOE synthesized in the presence of <b>2</b>                                                                       | S6  |
| <b>Figure S3.</b> $^{13}\text{C}\{^1\text{H}\}$ NMR spectrum ( $\text{CDCl}_3$ , 100 MHz, 298 K) of an $\alpha,\omega$ -di( <b>GC</b> )-PCOE synthesized in the presence of <b>2</b>                                                      | S7  |
| <b>Figure S4.</b> FT-IR spectrum (ATR) of an $\alpha,\omega$ -di( <b>GC</b> )-PCOE synthesized in the presence of <b>2</b>                                                                                                                | S8  |
| <b>Figure S5.</b> Variation of the molar mass of PCOE obtained in the presence of <b>2</b> as a function of time                                                                                                                          | S8  |
| <b>Figure S6.</b> $^1\text{H}$ NMR monitoring of the formation of $\alpha$ - <b>GC</b> , $\omega$ -vinyl-PCOE and $\alpha,\omega$ -di( <b>GC</b> )-PCOE during the ROMP of COE in the presence of <b>2</b> and DCM as solvent of reaction | S9  |
| <b>Figure S7.</b> Gas chromatogram showing the ethylene released during the ROMP of COE in the presence of <b>2</b>                                                                                                                       | S9  |
| <b>Figure S8.</b> $^1\text{H}$ NMR spectrum ( $\text{CDCl}_3$ , 500 MHz, 298 K) of an $\alpha$ - <b>GC</b> , $\omega$ -vinyl-P(3-Me-COE) prepared from <b>1</b>                                                                           | S10 |
| <b>Figure S9.</b> $^{13}\text{C}\{^1\text{H}\}$ NMR spectrum ( $\text{CDCl}_3$ , 100 MHz, 298 K) of an $\alpha$ - <b>GC</b> , $\omega$ -vinyl-P(3-Me-COE) prepared from <b>1</b>                                                          | S11 |
| <b>Figure S10.</b> DSC thermogram (second heating cycle) of an $\alpha$ - <b>GC</b> , $\omega$ -vinyl-P(3-Me-COE) prepared from <b>1</b>                                                                                                  | S11 |
| <b>Figure S11.</b> $^1\text{H}$ NMR spectrum ( $\text{CDCl}_3$ , 500 MHz, 298 K) of an $\alpha$ - <b>GC</b> , $\omega$ -vinyl-P(3-Me-COE) prepared from <b>2</b>                                                                          | S12 |

- Figure S12.**  $^{13}\text{C}\{^1\text{H}\}$  NMR spectrum ( $\text{CDCl}_3$ , 100 MHz, 298 K) of an  $\alpha$ -GC, $\omega$ -vinyl-P(3-Me-COE) prepared from **2** S13
- Figure S13.**  $^1\text{H}$  NMR spectrum ( $\text{CDCl}_3$ , 500 MHz, 298 K) of an  $\alpha$ -GC,  $\omega$ -vinyl-P(3-Et-COE) prepared from **1** S14
- Figure S14.**  $^{13}\text{C}\{^1\text{H}\}$  NMR spectrum ( $\text{CDCl}_3$ , 100 MHz, 298 K) of an  $\alpha$ -GC, $\omega$ -vinyl-P(3-Et-COE) prepared from **1** S15
- Figure S15.** DSC thermogram (second heating cycle) of an  $\alpha$ -GC, $\omega$ -vinyl-P(3-Et-COE) prepared from **1** S16
- Figure S16.**  $^1\text{H}$ - $^1\text{H}$  COSY NMR spectrum ( $\text{CDCl}_3$ , 500 MHz, 298 K) of an  $\alpha$ -GC, $\omega$ -vinyl-P(3-Et-COE) prepared from **2** S16
- Figure S17.**  $^{13}\text{C}\{^1\text{H}\}$  (DEPT 135) NMR spectrum ( $\text{CDCl}_3$ , 50 MHz, 298 K) of an  $\alpha$ -GC, $\omega$ -vinyl-P(3-Et-COE) prepared from **2** S17
- Figure S18.** FT-IR spectrum (ATR) of an  $\alpha$ -GC, $\omega$ -vinyl-P(3-Et-COE) prepared from **2** S17
- Figure S19.**  $^1\text{H}$  NMR spectrum ( $\text{CDCl}_3$ , 500 MHz, 298 K) of an  $\alpha$ -GC,  $\omega$ -vinyl-P(3-*n*-hexyl-COE) prepared from **1** S18
- Figure S20.**  $^{13}\text{C}\{^1\text{H}\}$  NMR spectrum ( $\text{CDCl}_3$ , 100 MHz, 298 K) of an  $\alpha$ -GC, $\omega$ -vinyl-P(3-*n*-hexyl-COE) prepared from **1** S19
- Figure S21.** DSC thermogram (second heating cycle) of an  $\alpha$ -GC, $\omega$ -vinyl-P(3-*n*-hexyl-COE) prepared from **1** S20
- Figure S22.**  $^1\text{H}$  NMR spectrum ( $\text{CDCl}_3$ , 500 MHz, 298 K) of an  $\alpha$ -GC, $\omega$ -vinyl-P(3-*n*-hexyl-COE) prepared from **2** S21
- Figure S23.**  $^{13}\text{C}\{^1\text{H}\}$  NMR spectrum ( $\text{CDCl}_3$ , 100 MHz, 298 K) of an  $\alpha$ -GC, $\omega$ -vinyl-P(3-*n*-hexylCOE) prepared from **2** S22

**Figure S24.**  $^1\text{H}$  NMR spectrum ( $\text{CDCl}_3$ , 500 MHz, 298 K) of an  $\alpha,\omega$ -di(**GC**)-P(5,6-epoxy-COE) prepared from **2** S23

**Figure S25.**  $^{13}\text{C}\{^1\text{H}\}$  NMR spectrum ( $\text{CDCl}_3$ , 100 MHz, 298 K) of an  $\alpha,\omega$ -di(**GC**)-P(5,6-epoxy-COE) prepared from **2** S24

**Figure S26.** DSC thermogram (second heating cycle) of an  $\alpha,\omega$ -di(**GC**)-P(5,6-epoxy-COE) prepared from **2** S25

**Figure S27.**  $^1\text{H}$  NMR spectrum ( $\text{CDCl}_3/\text{CD}_3\text{OD}$ , 500 MHz, 298 K) of an  $\alpha,\omega$ -di(**GC**)-P(5-OH-COE) prepared from **2** S26

**Figure S28.**  $^{13}\text{C}\{^1\text{H}\}$  NMR spectrum ( $\text{CDCl}_3/\text{CD}_3\text{OD}$ , 100 MHz, 298 K) of an  $\alpha,\omega$ -di(**GC**)-P(5-OH-COE) prepared from **2** S27

**Figure S29.**  $^1\text{H}$  NMR spectrum ( $\text{CDCl}_3$ , 500 MHz, 298 K) of a mixture of  $\alpha,\omega$ -di(**GC**)-P(5-O=COE) and  $\alpha$ -**GC**, $\omega$ -vinyl-P(5-O=COE) prepared from **2** S28

**Figure S30.**  $^{13}\text{C}\{^1\text{H}\}$  NMR spectrum ( $\text{CDCl}_3$ , 100 MHz, 298 K) of a mixture of  $\alpha,\omega$ -di(**GC**)-P(5-O=COE) and  $\alpha$ -**GC**, $\omega$ -vinyl-P(5-O=COE) prepared from **2** S29

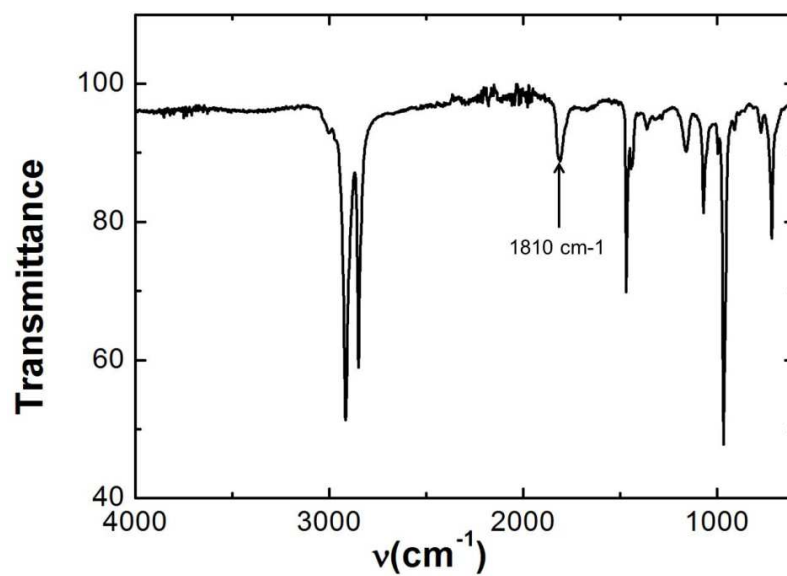

**Figure S1.** FT-IR spectrum (ATR) of an  $\alpha,\omega$ -di(GC)-PCOE synthesized from the ROMP of COE in the presence of **1** (Table 1, entry 1).

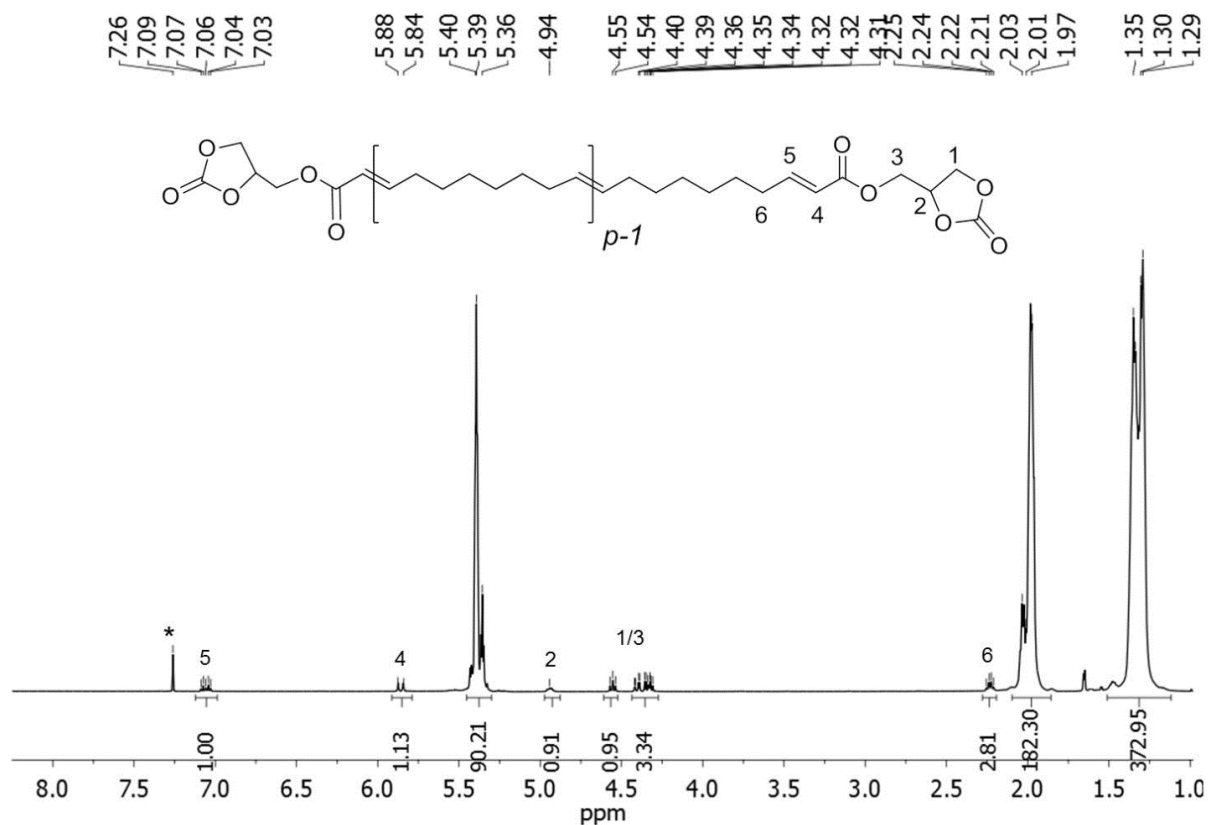

**Figure S2.** <sup>1</sup>H NMR spectrum (CDCl<sub>3</sub>, 500 MHz, 298 K) of an α,ω-di(GC)-PCOE (Table 1, entry 3). δ<sub>ppm</sub>: repeating unit: 5.36, 1.97, 1.29, chain-end groups: 7.03 (m, CH=CH-CO<sub>2</sub>), 5.84 (m, CH=CH-CO<sub>2</sub>), 4.94 (broad signal, CH<sub>2</sub>-CH-CH<sub>2</sub>OCOO), 4.55–4.32 (m, CH<sub>2</sub>-CH-CH<sub>2</sub>OCOO and CH<sub>2</sub>-CH-CH<sub>2</sub>OCOO) (\* stands for residual solvent resonance).

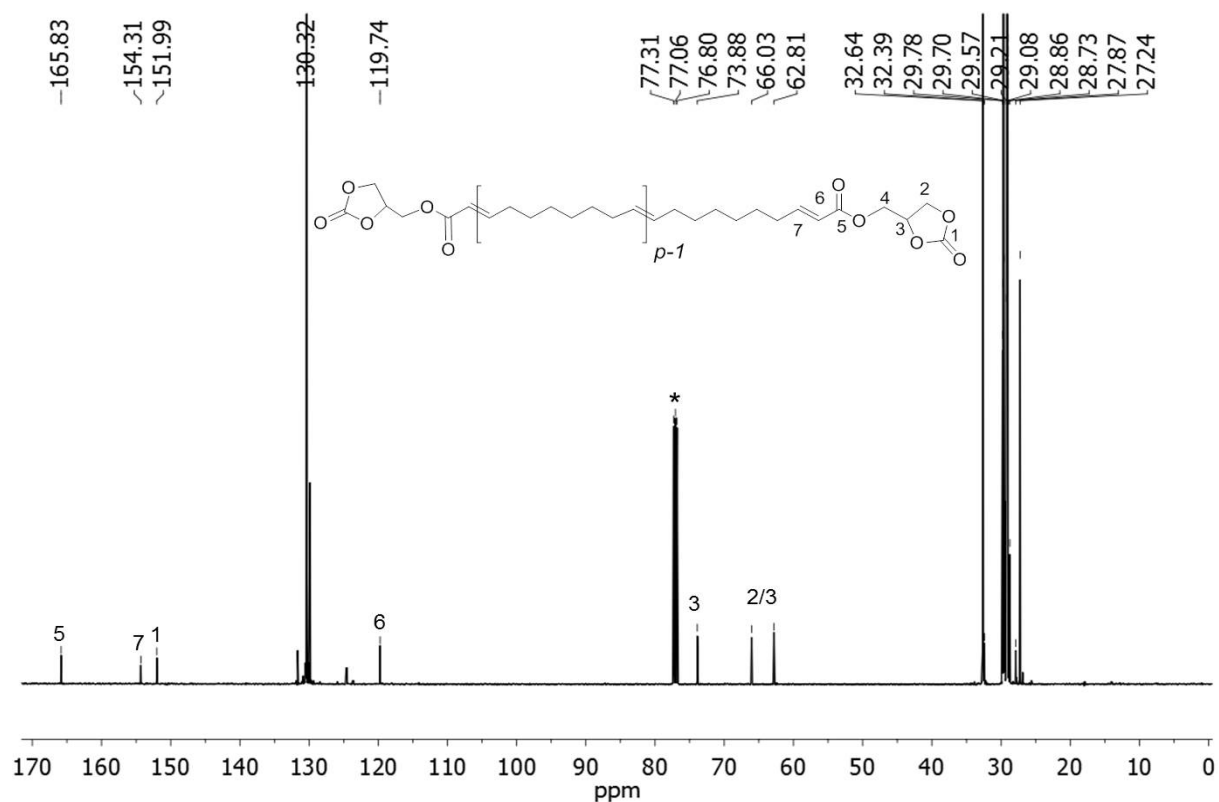

**Figure S3.**  $^{13}\text{C}\{^1\text{H}\}$  NMR spectrum ( $\text{CDCl}_3$ , 100 MHz, 298 K) of an  $\alpha,\omega$ -di(GC)-PCOE (Table 1, entry 3).  $\delta_{\text{ppm}}$ : repeating unit: 130.3, 129.9, 32.6, 29.8–27.2, chain-end groups: 165.8 (OC=O), 154.3 (O=COO), 152.0 (CH=CH-COO), 119.7 (CH=CH-COO), 73.9 ( $\text{CH}_2$ -CH- $\text{CH}_2$ OCOO), 66.0, 62.8 ( $\text{CH}_2$ -CH- $\text{CH}_2$ OCOO and  $\text{CH}_2$ -CH- $\text{CH}_2$ OCOO) (\* stands for residual solvent resonance).

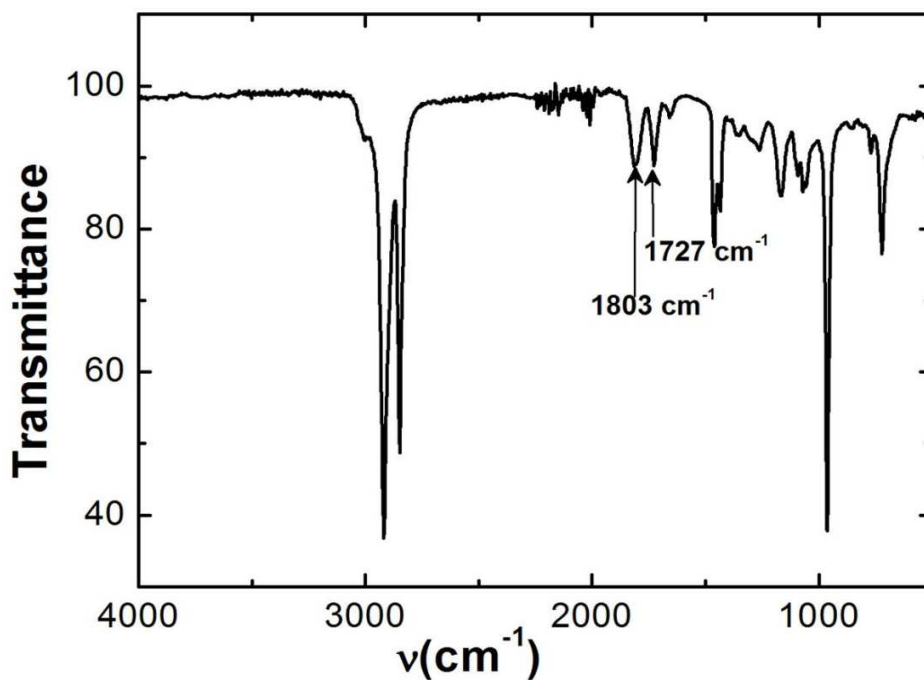

**Figure S4.** FT-IR spectrum (ATR) of an  $\alpha,\omega$ -di(GC)-PCOE synthesized from the ROMP of COE in the presence of **2** (Table 1, entry 3).

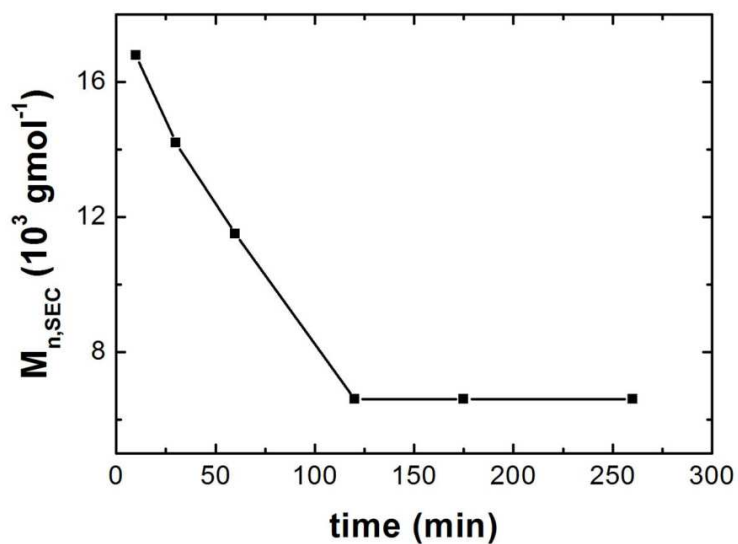

**Figure S5.** Variation of the molar mass of PCOE obtained in the presence of **2** as a function of time (Table 1, entry 3).



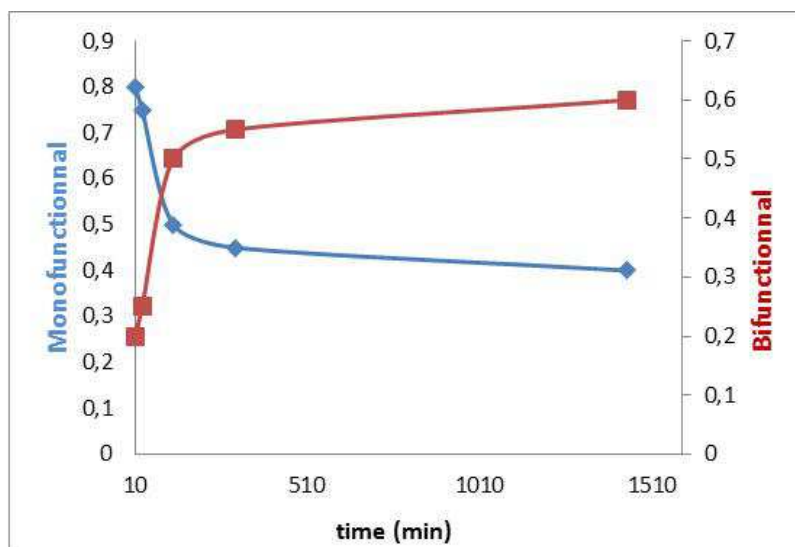

**Figure 6.**  $^1\text{H}$  NMR monitoring of the formation of  $\alpha\text{-GC},\omega\text{-vinyl-PCOE}$  (monofunctional, ◆) and  $\alpha,\omega\text{-di(GC)-PCOE}$  (bifunctional, ■) during the ROMP of COE in the presence of **2** and DCM as solvent of reaction.

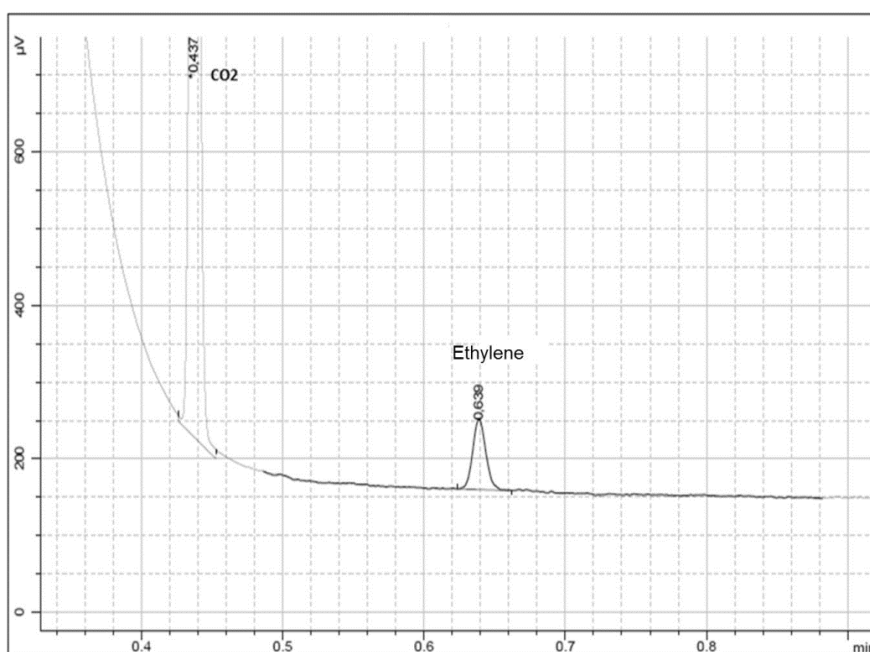

**Figure S7.** Gas chromatogram showing the ethylene released during the ROMP of COE in the presence of **2** (Table 1, entry 3).

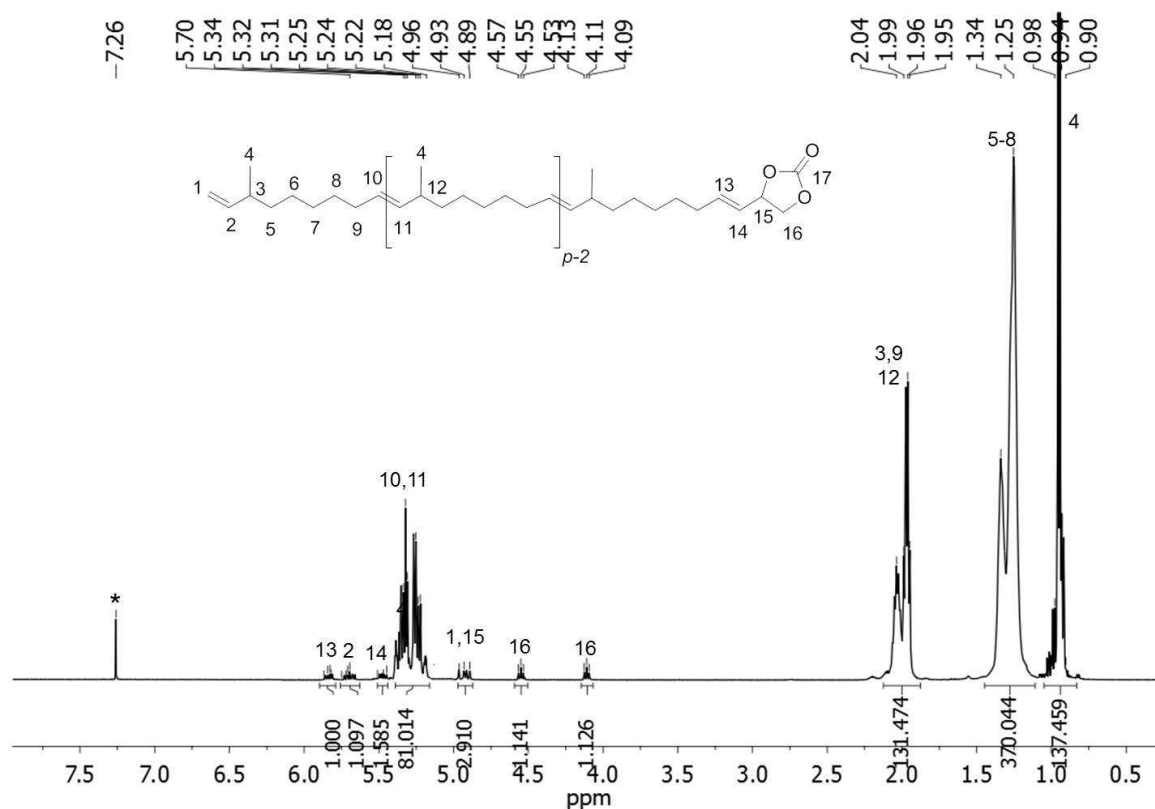

**Figure S8.** <sup>1</sup>H NMR spectrum (CDCl<sub>3</sub>, 500 MHz, 298 K) of an α-GC,ω-vinyl-P(3-Me-COE) prepared from **1** (Table 1, entry 5). δ<sub>ppm</sub>: repeating unit: 5.39–5.18, 2.04–1.95, 1.34, 1.25, 0.94, chain-end groups: 5.87 (m, CH=CH-CH-OCO<sub>2</sub>), 5.75 (m, CH=CH-CH-OCO<sub>2</sub>), 5.45 (CH<sub>2</sub>=CH-CH), 4.89 (m, CH<sub>2</sub>=CH-CH and CH=CH-CH-OCO<sub>2</sub>), 4.57–4.09 (CH-CH<sub>2</sub>-OCOO), 2.04 (m, CH<sub>2</sub>=CH-CH) (\* stands for residual solvent resonance).

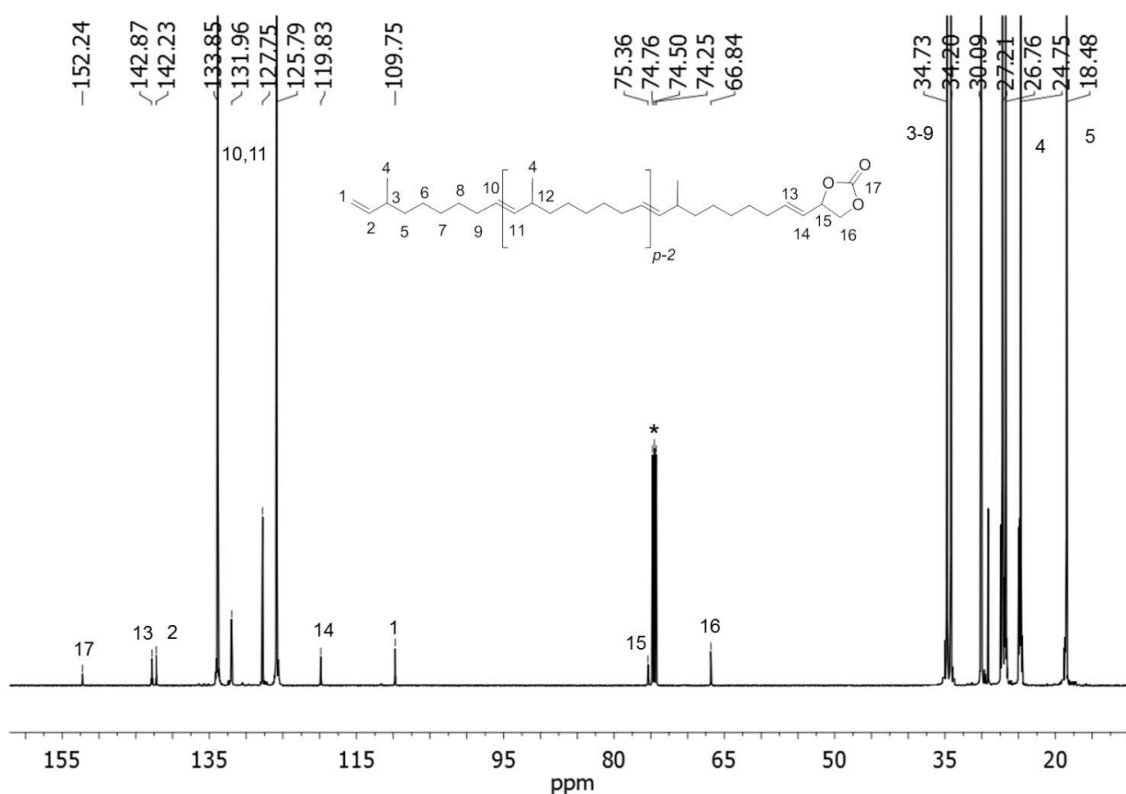

**Figure S9.**  $^{13}\text{C}\{^1\text{H}\}$  NMR spectrum ( $\text{CDCl}_3$ , 100 MHz, 298 K) of an  $\alpha\text{-GC},\omega\text{-vinyl-P(3-Me-COE)}$  prepared from **1** (Table 1, entry 5).  $\delta_{\text{ppm}}$ : repeating unit: 133.8, 132.0, 127.7, 125.8, 34.7-27.7, 18.5. Chain-end groups: 152.2 (O=COO), 142.9 ( $\text{CH}=\text{CH}-\text{CHOCOO}$ ), 142.2 ( $\text{CH}_2=\text{CH}-\text{CH}$ ), 119.8 ( $\text{CH}=\text{CH}-\text{CHOCOO}$ ), 109.7 ( $\text{CH}_2=\text{CH}-\text{CH}$ ), 75.4 ( $\text{CH}=\text{CH}-\text{CHOCOO}$ ), 66.8 ( $\text{CH}-\text{CH}_2-\text{OCOO}$ ) (\* stands for residual solvent resonance).

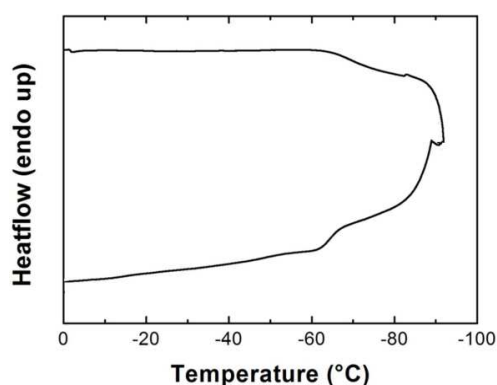

**Figure S10.** DSC thermogram (second heating cycle) of an  $\alpha\text{-GC},\omega\text{-vinyl-P(3-Me-COE)}$  prepared from **1** ( $T_g = -64$   $^{\circ}\text{C}$ ) synthesized from the ROMP of 3-Me-COE in the presence of **1** (Table 1, entry 5).

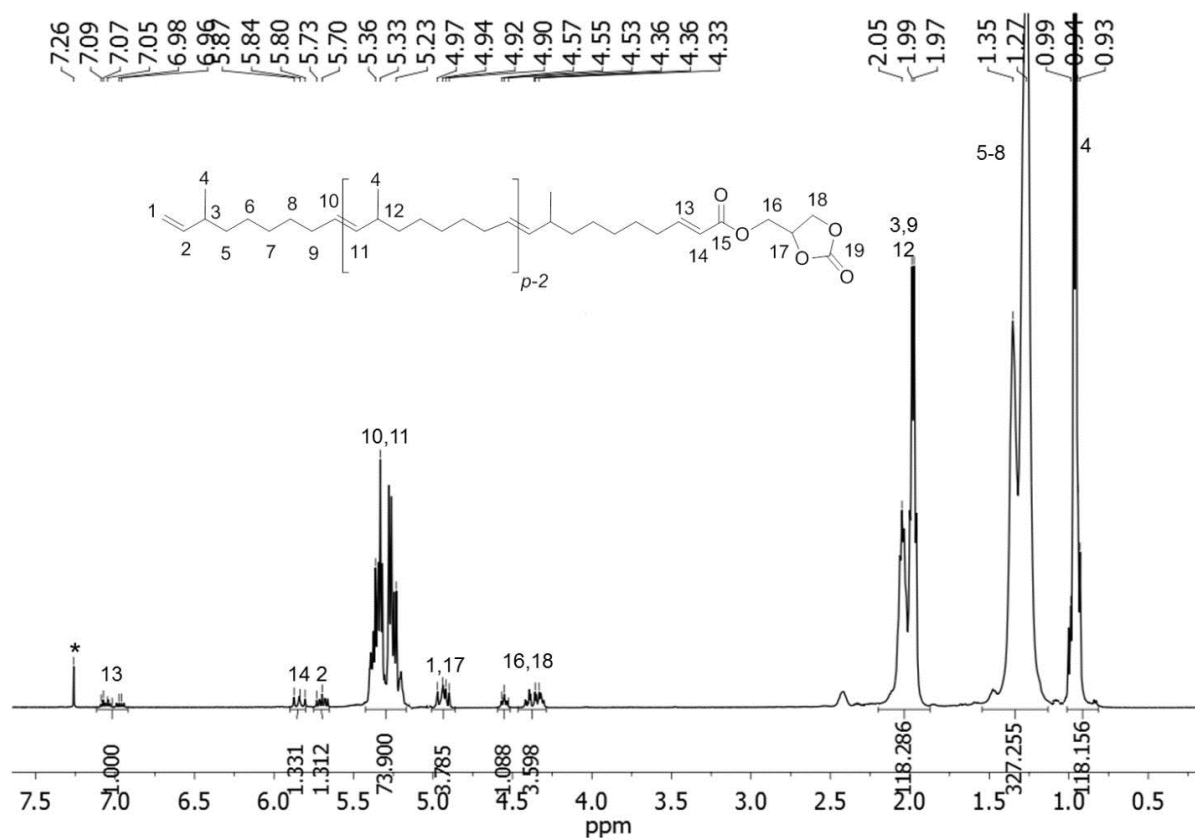

**Figure S11.** <sup>1</sup>H NMR spectrum (CDCl<sub>3</sub>, 500 MHz, 298 K) of an α-GC,ω-vinyl-PCOE prepared from **2** (Table 1, entry 7). δ<sub>ppm</sub>: repeating unit: 5.39–5.20, 2.04–1.97, 1.34, 1.25, 0.94. Chain-end groups: 6.94 (m, CH=CH-CO<sub>2</sub>), 5.80 (m, CH=CH-CO<sub>2</sub>), 5.66 (m, CH<sub>2</sub>=CH-CH), 4.90 (m, CH<sub>2</sub>=CH-CH and CH=CH-CH-OCO<sub>2</sub>), 4.57–4.33 (m, CH<sub>2</sub>-CH-CH<sub>2</sub>OCOO and CH<sub>2</sub>-CH-CH<sub>2</sub>OCOO), 2.05 (m, CH<sub>2</sub>=CH-CH) (\* stands for residual solvent resonance).

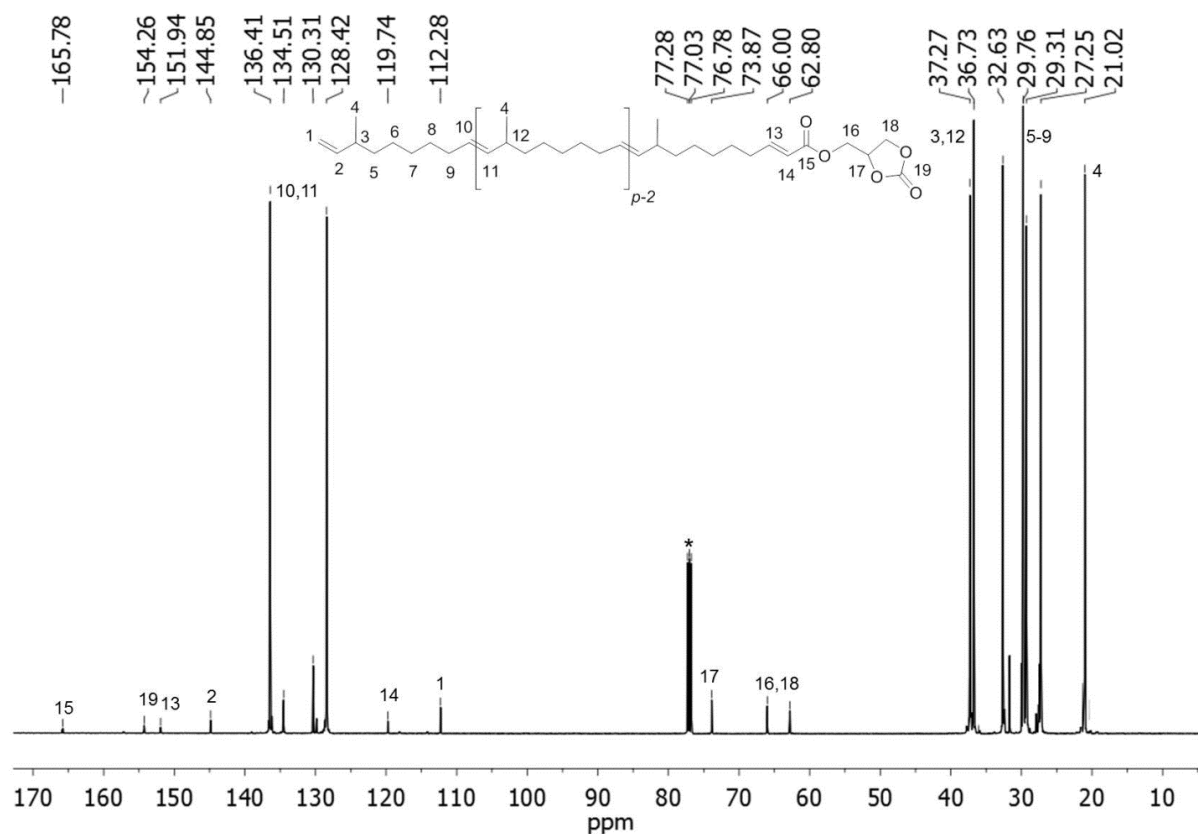

**Figure S12.**  $^{13}\text{C}\{^1\text{H}\}$  NMR spectrum ( $\text{CDCl}_3$ , 100 MHz, 298 K) of an  $\alpha\text{-GC},\omega\text{-vinyl-P}(3\text{-MeCOE})$  prepared from **2** (Table 1, entry 7).  $\delta_{\text{ppm}}$ : repeating unit: 136.4, 134.5, 130.3, 128.4, 37.3–27.2, 21.0. Chain-end groups: 165.8 (OC=O), 154.3 (O=COO), 151.9 ( $\text{CH}=\text{CH}\text{-COO}$ ), 144.8 ( $\text{CH}_2=\text{CH}\text{-CH}$ ), 119.7 ( $\text{CH}=\text{CH}\text{-COO}$ ), 112.3 ( $\text{CH}_2=\text{CH}\text{-CH}$ ), 73.9 ( $\text{CH}_2\text{-CH}\text{-CH}_2\text{OCOO}$ ), 66.0, 62.8 ( $\text{CH}_2\text{-CH}\text{-CH}_2\text{OCOO}$  and  $\text{CH}_2\text{-CH}\text{-CH}_2\text{OCOO}$ ) (\* stands for residual solvent resonance).

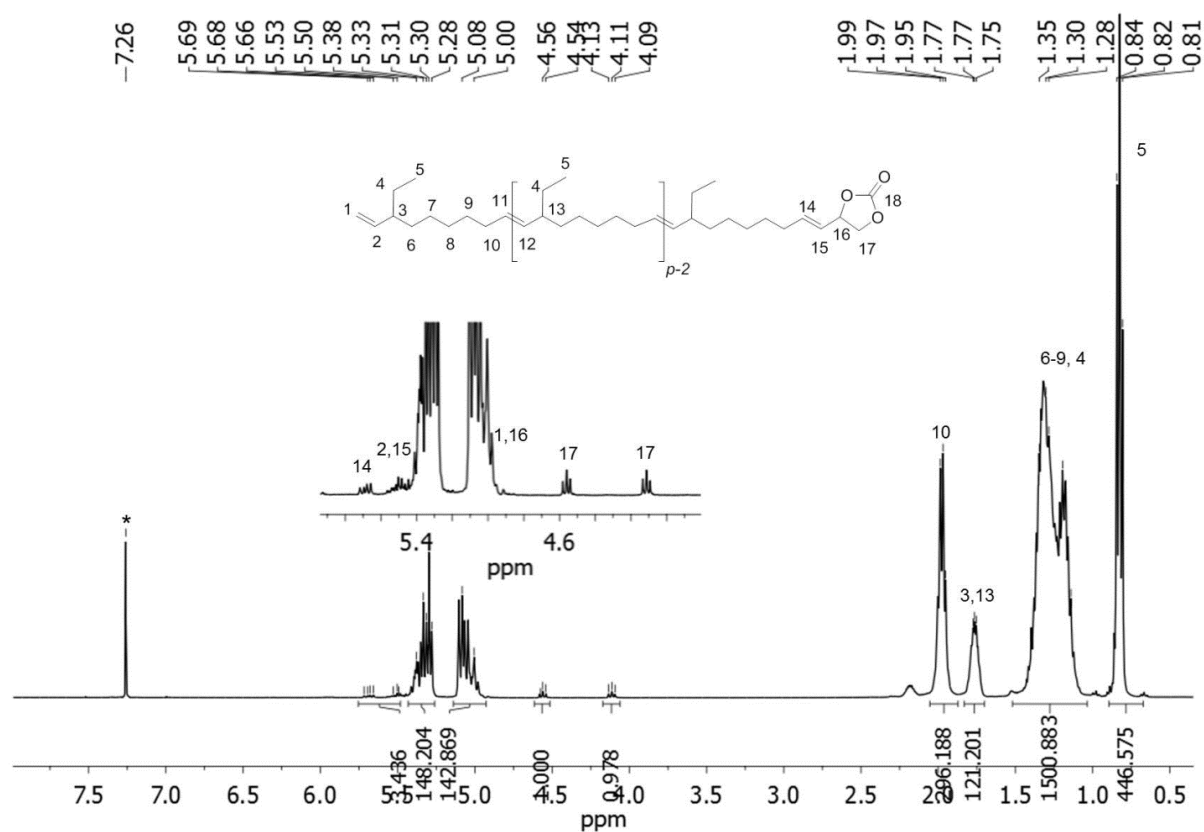

**Figure S13.** <sup>1</sup>H NMR spectrum (CDCl<sub>3</sub>, 500 MHz, 298 K) of an α-GC,ω-vinyl-P(3-Et-COE) prepared from **1** (Table 1, entry 9). δ<sub>ppm</sub>: repeating unit: 5.38–5.00, 1.99–1.95, 1.75, 1.35–1.28, 0.81. Chain-end groups: 5.66 (m, CH=CH-CH-OCO<sub>2</sub>), 5.50 (m, CH=CH-CH-OCO<sub>2</sub>), 5.45 (CH<sub>2</sub>=CH-CH and CH=CH-CH-OCO<sub>2</sub>), 5.00 (m, CH<sub>2</sub>=CH-CH, and CH=CH-CH-OCO<sub>2</sub>), 4.57–4.09 (CH-CH<sub>2</sub>-OCOO), 1.75 (m, CH<sub>2</sub>=CH-CH) (\* stands for residual solvent resonance).

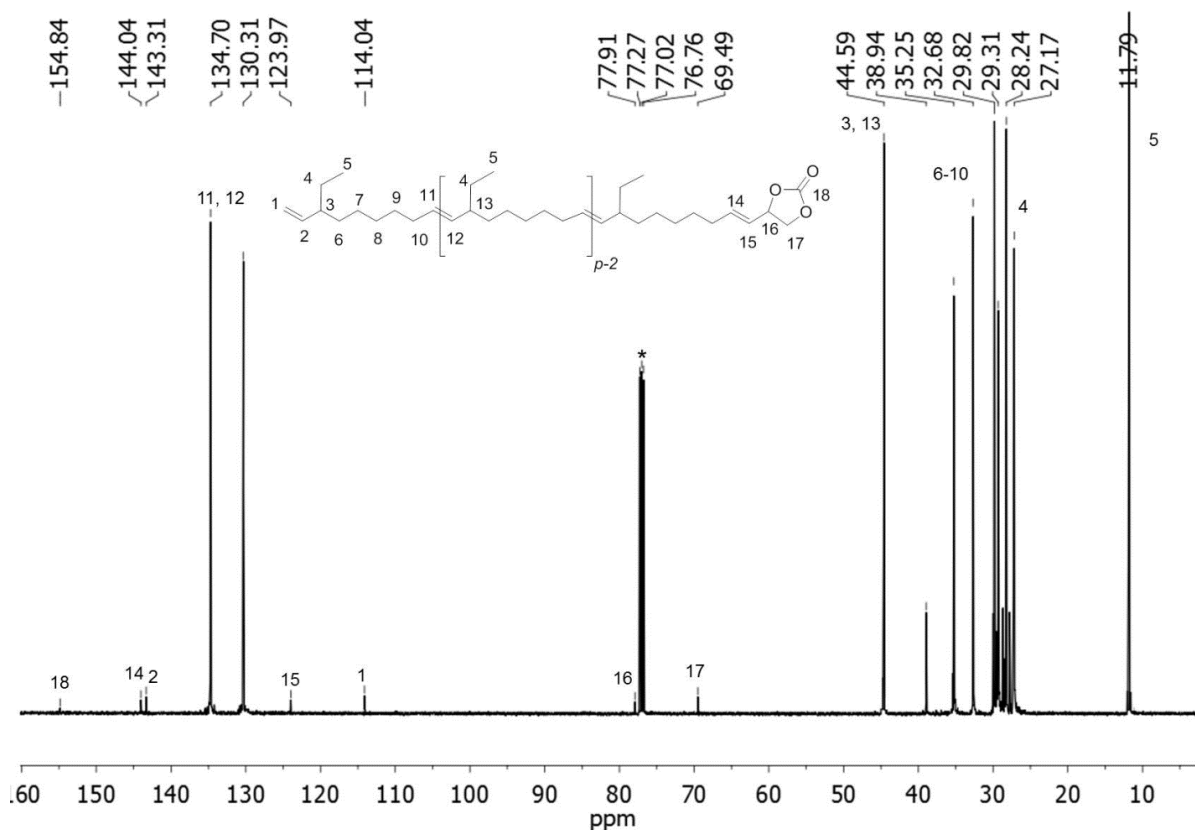

**Figure S14.**  $^{13}\text{C}\{^1\text{H}\}$  NMR spectrum ( $\text{CDCl}_3$ , 100 MHz, 298 K) of an  $\alpha$ -GC, $\omega$ -vinyl-P(3-Et-COE) prepared from **1** (Table 1, entry 9).  $\delta_{\text{ppm}}$ : repeating unit: 134.7, 130.3, 40.6, 38.9–27.2, 11.8. Chain-end groups: 154.8 (O=COO), 144.0 (CH=CH-CHOCOO), 143.3 (CH<sub>2</sub>=CH-CH), 124.0 (CH=CH-CHOCOO), 114.0 (CH<sub>2</sub>=CH-CH), 77.9 (CH=CH-CHOCOO), 69.5 (CH-CH<sub>2</sub>-OCOO) (\* stands for residual solvent resonance).

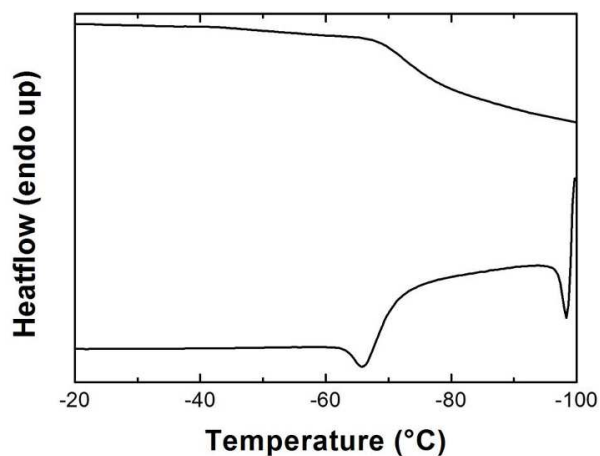

**Figure S15.** DSC thermogram (second heating cycle) of an  $\alpha$ -GC, $\omega$ -vinyl-P(3-Et-COE) ( $T_g = -69$  °C) synthesized from the ROMP of 3-Et-COE in the presence of **1** (Table 1, entry 9).

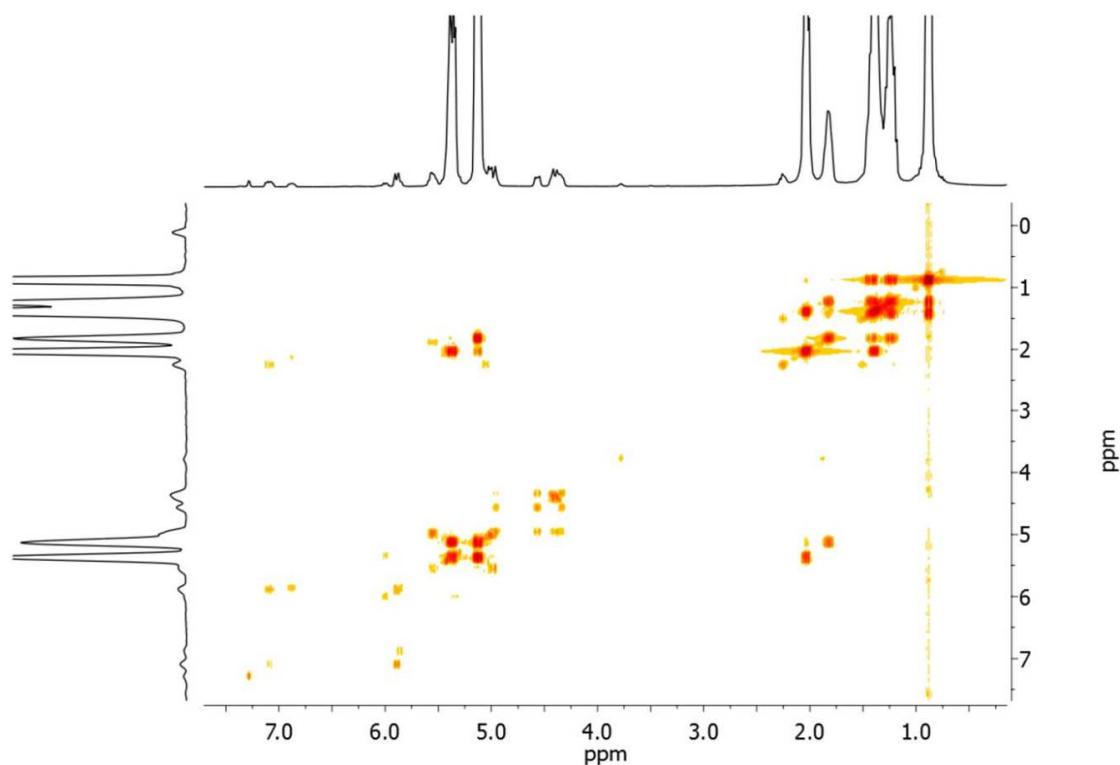

**Figure S16.**  $^1\text{H}$ - $^1\text{H}$  COSY NMR spectrum ( $\text{CDCl}_3$ , 500 MHz, 298 K) of an  $\alpha$ -GC, $\omega$ -vinyl-P(3-Et-COE) prepared from **2** (Table 1, entry 11).



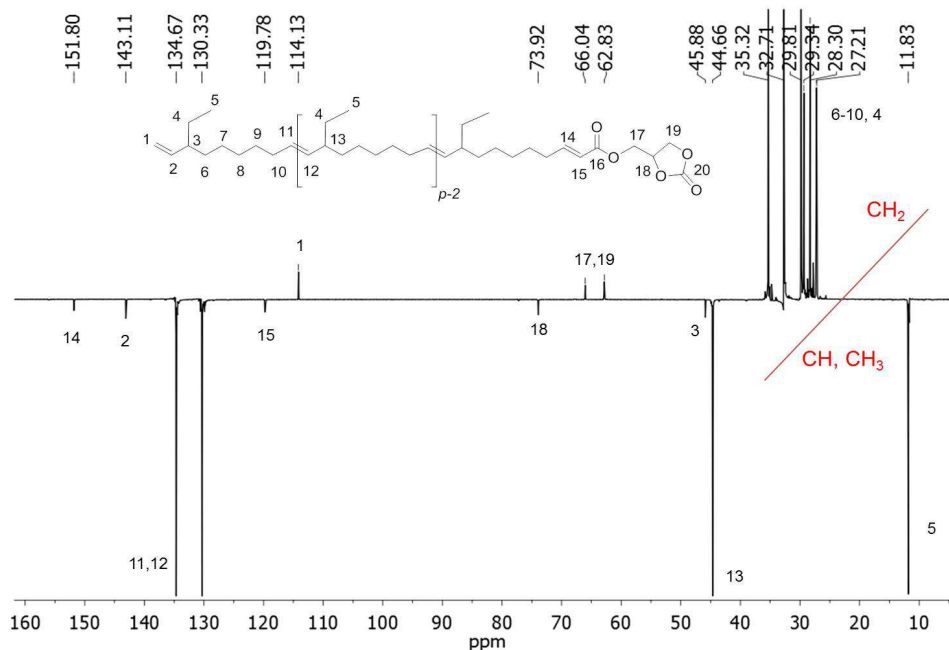

**Figure S17.**  $^{13}\text{C}\{^1\text{H}\}$  (DEPT 135) NMR spectrum ( $\text{CDCl}_3$ , 50 MHz, 298 K) of an  $\alpha\text{-GC},\omega\text{-vinyl-P(3-Et-COE)}$  prepared from **2** (Table 1, entry 11).  $\delta_{\text{ppm}}$ : repeating unit: 134.7, 130.3, 44.7, 35.3–27.2, 11.8. Chain-end groups: 151.8 ( $\text{CH}=\text{CH}-\text{COO}$ ), 143.1 ( $\text{CH}_2=\text{CH}-\text{CH}$ ), 119.8 ( $\text{CH}=\text{CH}-\text{COO}$ ), 114.1 ( $\text{CH}_2=\text{CH}-\text{CH}$ ), 73.9 ( $\text{CH}_2-\text{CH}-\text{CH}_2\text{OCOO}$ ), 66.0, 62.8 ( $\text{CH}_2-\text{CH}-\text{CH}_2\text{OCOO}$  and  $\text{CH}_2-\text{CH}-\text{CH}_2\text{OCOO}$ ), 45.9 ( $\text{CH}_2=\text{CH}-\text{CH}$ ).

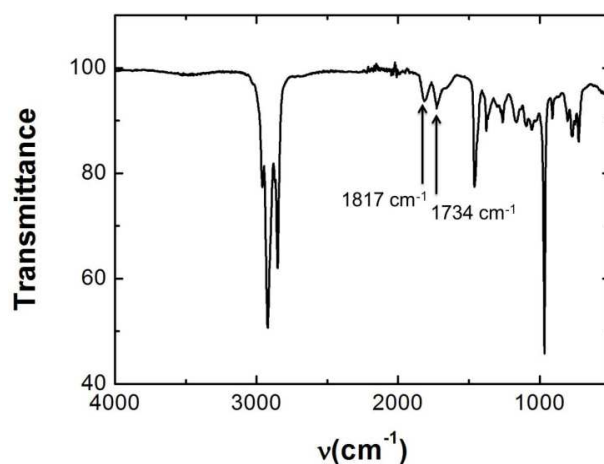

**Figure S18.** FT-IR spectrum (ATR) of an  $\alpha\text{-GC},\omega\text{-vinyl-P(3-Et-COE)}$  synthesized from the ROMP of 3-Et-COE in the presence of **2** (Table 1, entry 11).

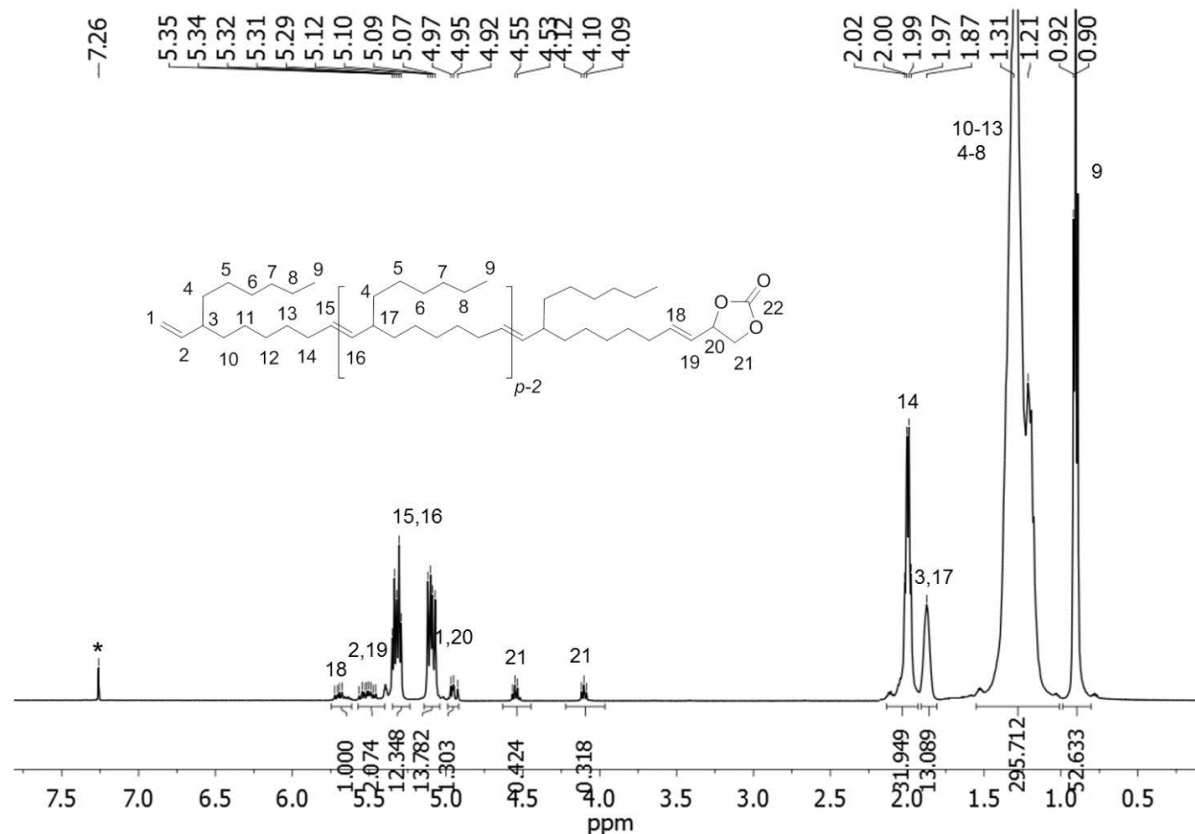

**Figure S19.**  $^1\text{H}$  NMR spectrum ( $\text{CDCl}_3$ , 500 MHz, 298 K) of an  $\alpha\text{-GC},\omega\text{-vinyl-P}(3\text{-}n\text{-hexyl-COE})$  prepared from **1** (Table 1, entry 13).  $\delta_{\text{ppm}}$ : repeating unit: 5.34–5.07, 2.02–1.97, 1.87, 1.31–1.21, 0.90. Chain-end groups: 5.68 (m,  $\text{CH}=\text{CH}-\text{CO}_2$ ), 5.46 (m,  $\text{CH}=\text{CH}-\text{CH}-\text{OCO}_2$  and  $\text{CH}=\text{CH}-\text{CH}-\text{OCO}_2$ ), 5.00 (m,  $\text{CH}_2=\text{CH}-\text{CH}$ , and  $\text{CH}=\text{CH}-\text{CH}-\text{OCO}_2$ ), 4.57–4.09 ( $\text{CH}-\text{CH}_2\text{-OCO}$ ), 1.87 (m,  $\text{CH}_2=\text{CH}-\text{CH}$ ) (\* stands for residual solvent resonance).

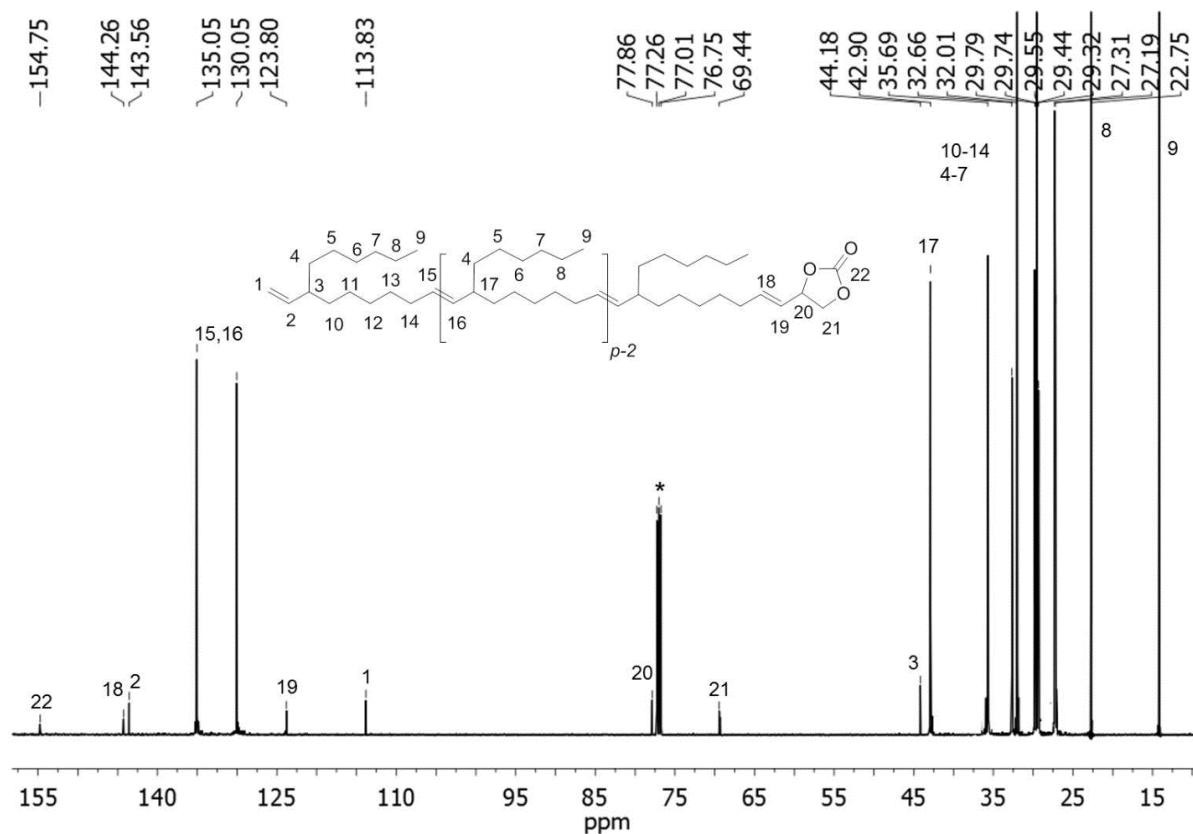

**Figure S20.**  $^{13}\text{C}\{^1\text{H}\}$  NMR spectrum ( $\text{CDCl}_3$ , 100 MHz, 298 K) of an  $\alpha\text{-GC},\omega\text{-vinyl-P}(3\text{-}n\text{-hexyl-COE})$  prepared from **1** (Table 1, entry 13).  $\delta_{\text{ppm}}$ : repeating unit: 135.0, 130.0, 42.9, 35.7–22.7, 14.1. Chain-end groups: 154.7 ( $\text{O}=\text{COO}$ ), 144.3 ( $\text{CH}=\text{CH}-\text{CHOCOO}$ ), 143.6 ( $\text{CH}_2=\text{CH}-\text{CH}$ ), 123.8 ( $\text{CH}=\text{CH}-\text{CHOCOO}$ ), 113.8 ( $\text{CH}_2=\text{CH}-\text{CH}$ ), 77.9 ( $\text{CH}=\text{CH}-\text{CHOCOO}$ ), 69.5 ( $\text{CH}-\text{CH}_2-\text{OCOO}$ ), 44.2 ( $\text{CH}_2=\text{CH}-\text{CH}$ ) (\* stands for residual solvent resonance).

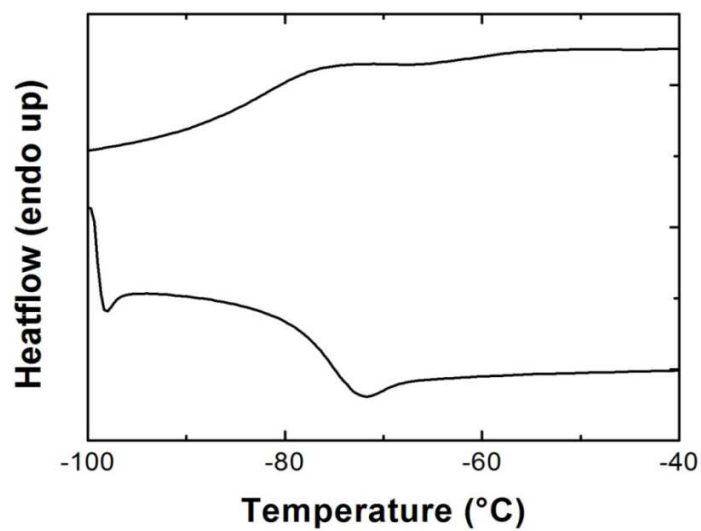

**Figure S21.** DSC thermogram (second heating cycle) of an  $\alpha$ -GC, $\omega$ -vinyl-P(3-*n*-hexyl-COE) ( $T_g = -77$  °C) synthesized from the ROMP of 3-*n*-hexyl-COE in the presence of **1** (Table 1, entry 13).

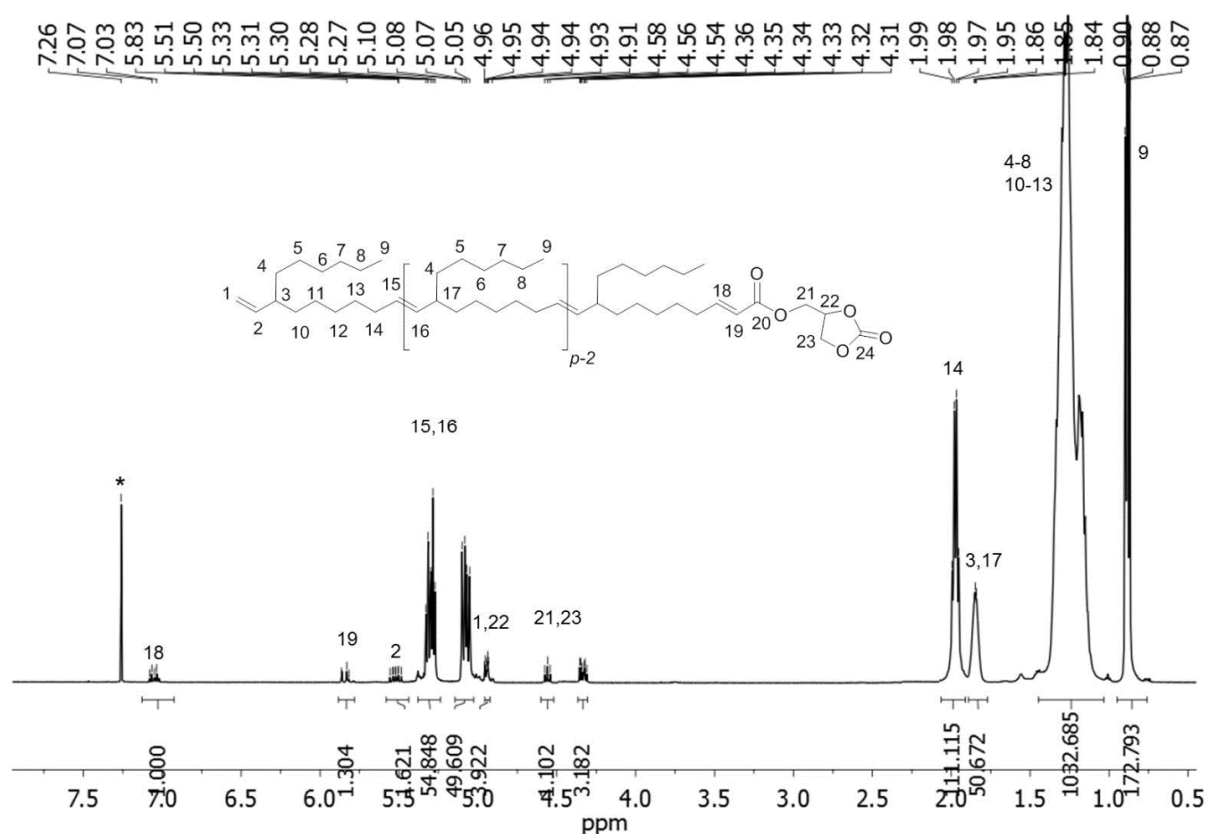

**Figure S22.** <sup>1</sup>H NMR spectrum (CDCl<sub>3</sub>, 500 MHz, 298 K) of an α-GC,ω-vinyl-P(3-n-hexyl-COE) prepared from **2** (Table 1, entry 15). δ<sub>ppm</sub>: repeating unit: 5.33–5.05, 1.99, 1.84, 1.33–1.15, 0.87. Chain-end groups: 7.03 (m, CH=CH-CO<sub>2</sub>), 5.82 (m, CH=CH-CO<sub>2</sub>), 5.48 (m, CH<sub>2</sub>=CH-CH), 4.91 (m, CH<sub>2</sub>=CH-CH, and CH=CH-CH-OCO<sub>2</sub>), 4.58–4.31 (m, CH<sub>2</sub>-CH-CH<sub>2</sub>OCOO and CH<sub>2</sub>-CH-CH<sub>2</sub>OCOO), 1.84 (m, CH<sub>2</sub>=CH-CH) (\* stands for residual solvent resonance).

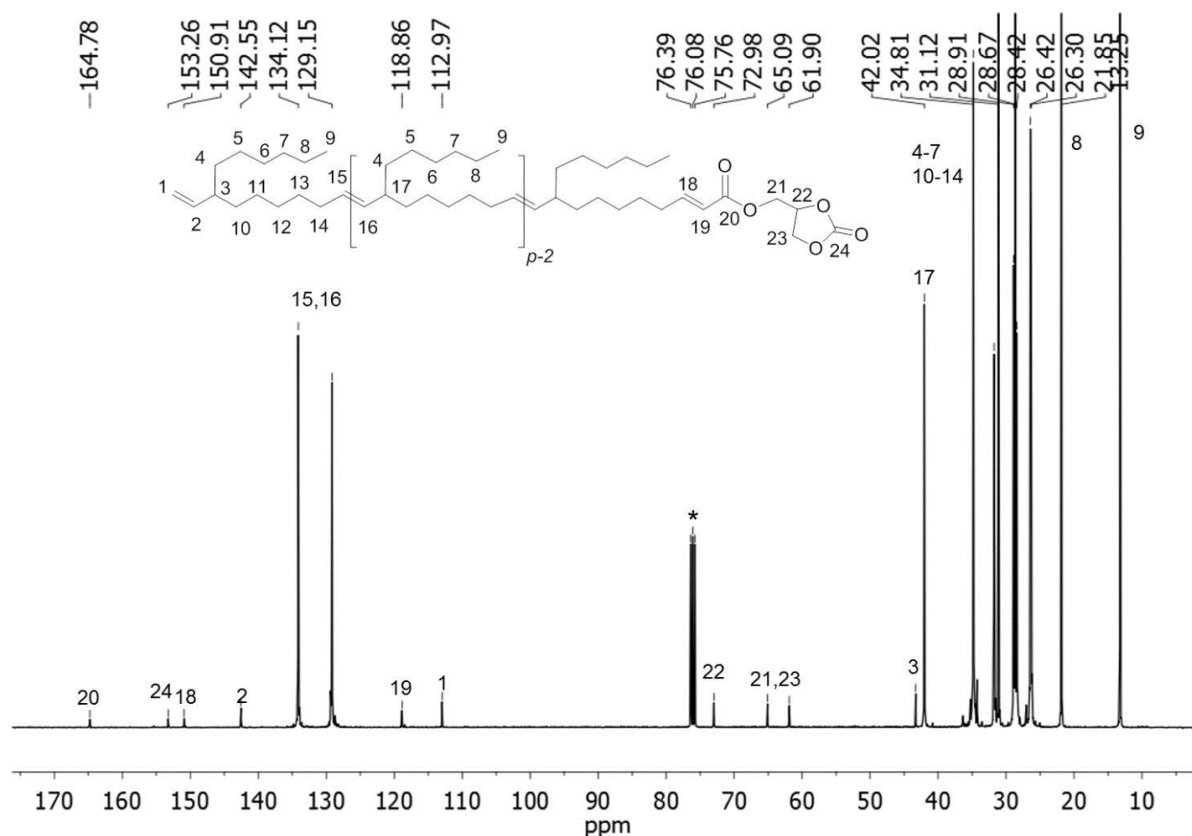

**Figure S23.**  $^{13}\text{C}\{^1\text{H}\}$  NMR spectrum ( $\text{CDCl}_3$ , 100 MHz, 298 K) of an  $\alpha$ -GC, $\omega$ -vinyl-P(3-*n*-hexyl-COE) prepared from **2** (Table 1, entry 15).  $\delta_{\text{ppm}}$ : repeating unit: 134.1, 129.1, 42.0, 34.8–21.8, 13.2. Chain-end groups: 164.8 (OC=O), 153.3 (O=COO), 150.9 ( $\text{CH}=\text{CH}-\text{COO}$ ), 142.5 ( $\text{CH}_2=\text{CH}-\text{CH}$ ), 118.9 ( $\text{CH}=\text{CH}-\text{COO}$ ), 112.9 ( $\text{CH}_2=\text{CH}-\text{CH}$ ), 73.0 ( $\text{CH}_2-\text{CH}-\text{CH}_2\text{OCOO}$ ), 65.1, 61.9 ( $\text{CH}_2-\text{CH}-\text{CH}_2\text{OCOO}$  and  $\text{CH}_2-\text{CH}-\text{CH}_2\text{OCOO}$ ), 43.3 ( $\text{CH}_2=\text{CH}-\text{CH}$ ) (\* stands for residual solvent resonance).

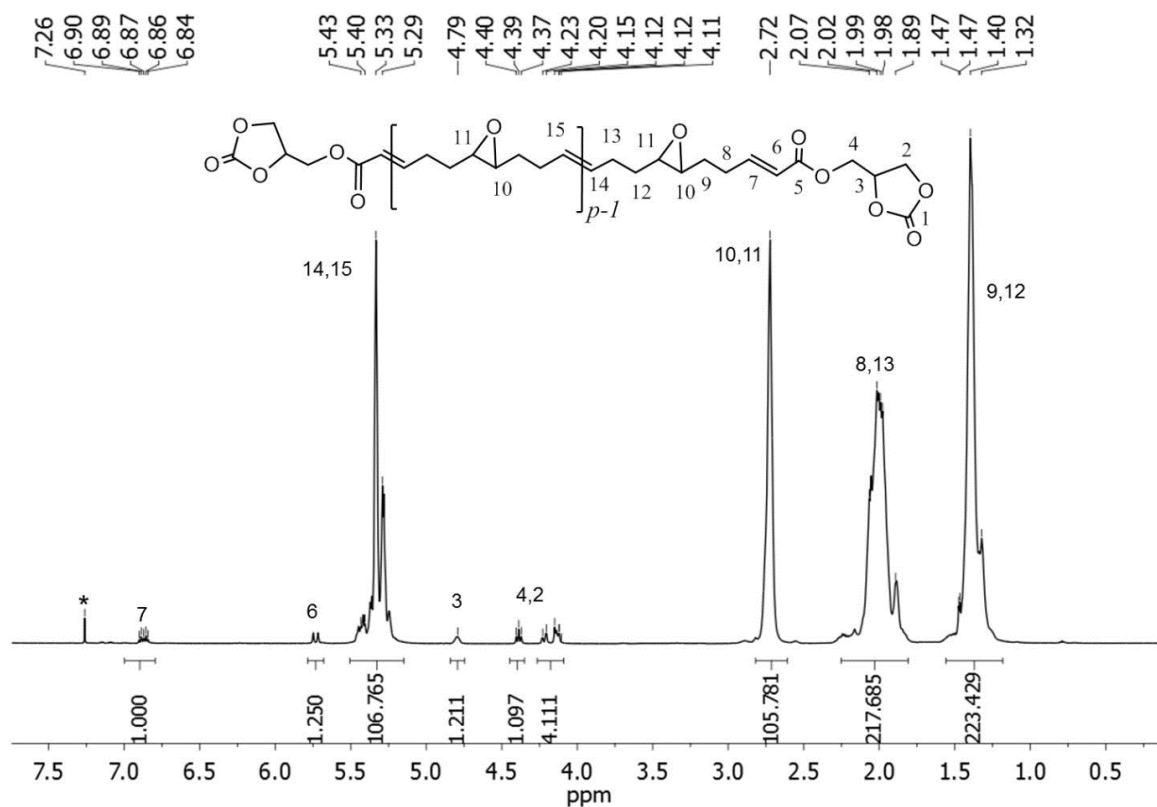

**Figure S24.**  $^1\text{H}$  NMR spectrum ( $\text{CDCl}_3$ , 500 MHz, 298 K) of an  $\alpha,\omega$ -di(GC)-P(5,6-epoxy-COE) prepared from **2** (Table 1, entry 18).  $\delta_{\text{ppm}}$ : repeating unit: 5.43-5.29, 2.72, 2.07–1.89, 1.47-1.32 chain-end groups: 6.84 (m,  $\text{CH}=\text{CH}-\text{CO}_2$ ), 5.72 (m,  $\text{CH}=\text{CH}-\text{CO}_2$ ), 4.79 (broad signal,  $\text{CH}_2-\text{CH}-\text{CH}_2\text{OCOO}$ ), 4.40–4.11 (m,  $\text{CH}_2-\text{CH}-\text{CH}_2\text{OCOO}$  and  $\text{CH}_2-\text{CH}-\text{CH}_2\text{OCOO}$ ) (\* stands for residual solvent resonance).

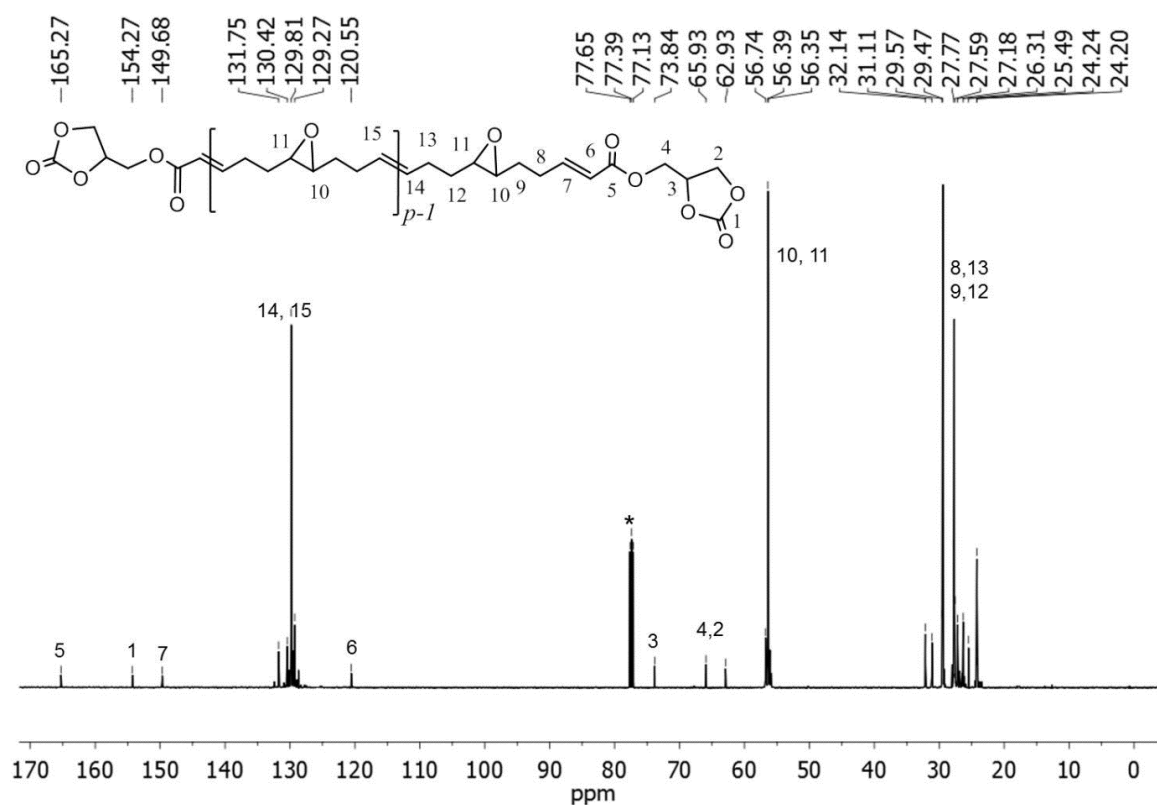

**Figure S25.**  $^{13}\text{C}\{^1\text{H}\}$  NMR spectrum ( $\text{CDCl}_3$ , 100 MHz, 298 K) of an  $\alpha,\omega$ -di(GC)-P(5,6-epoxy-COE) prepared from **2** (Table 1, entry 18).  $\delta_{\text{ppm}}$ : repeating unit: 131.7–129.3, 56.7, 32.1–24.2, chain-end groups: 165.3 (OC=O), 154.3 (O=COO), 149.7 (CH=CH-COO), 120.5 (CH=CH-COO), 73.8 ( $\text{CH}_2\text{-CH-CH}_2\text{OCOO}$ ), 65.9, 62.9 ( $\text{CH}_2\text{-CH-CH}_2\text{OCOO}$  and  $\text{CH}_2\text{-CH-CH}_2\text{OCOO}$ ) (\* stands for residual solvent resonance).



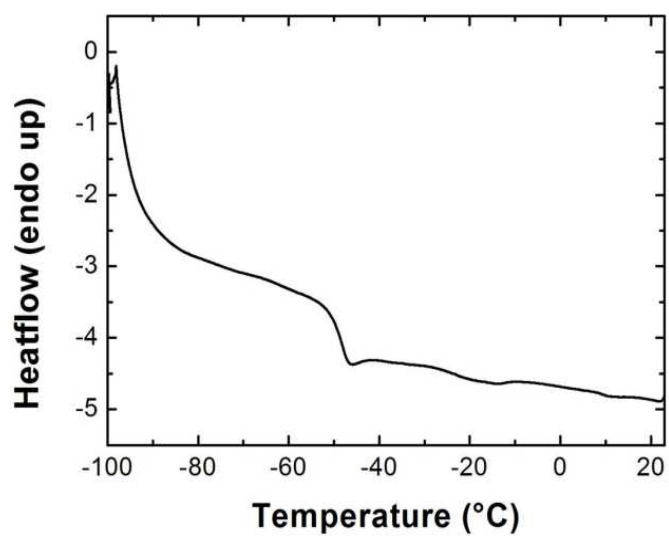

**Figure S26.** DSC thermogram (second heating cycle) of an  $\alpha,\omega$ -di(GC)-P(5,6-epoxy-COE) ( $T_g = -48$  °C) synthesized from the ROMP of 5,6-epoxy-COE in the presence of **2** (Table 1, entry 18).

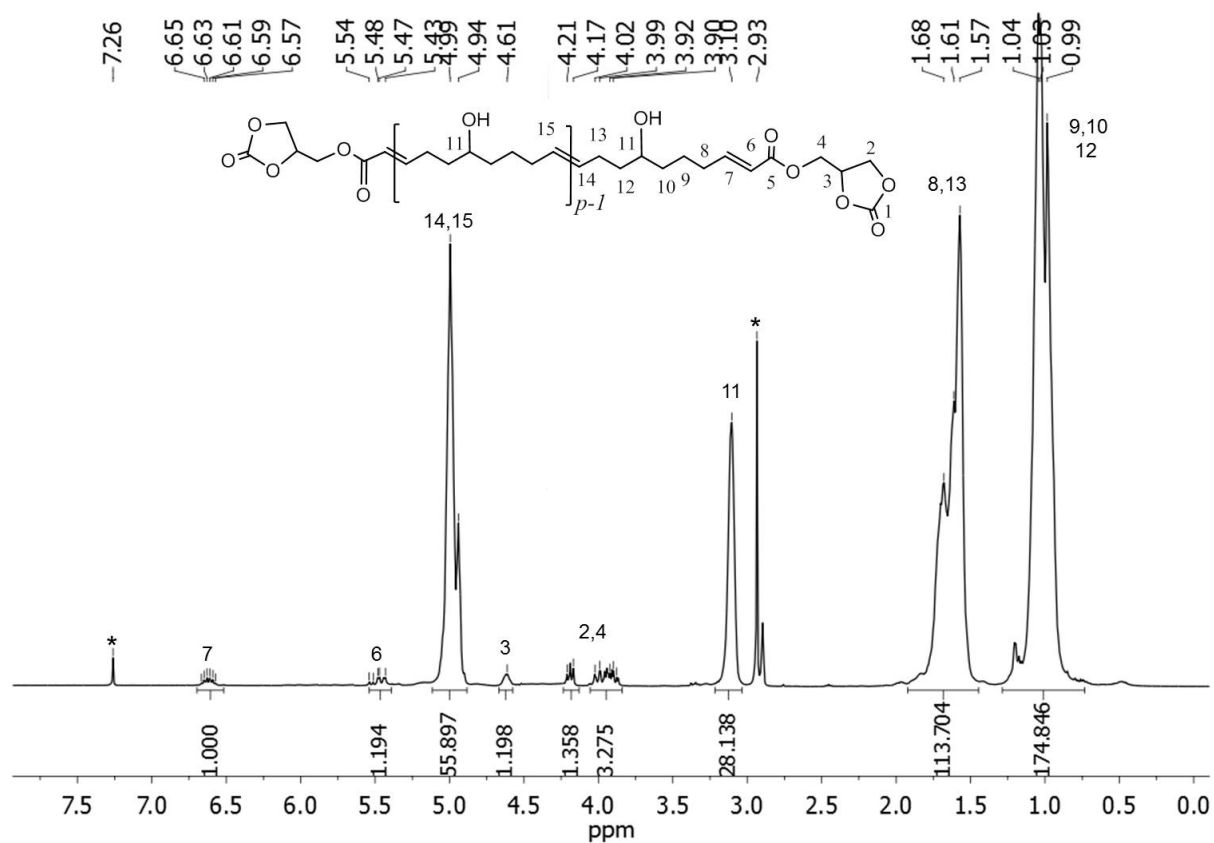

**Figure S27.**  $^1\text{H}$  NMR spectrum ( $\text{CDCl}_3/\text{CD}_3\text{OD}$ , 500 MHz, 298 K) of an  $\alpha,\omega$ -di(GC)-P(5-OH-COE) prepared from **2** (Table 1, entry 19).  $\delta_{\text{ppm}}$ : repeating unit: 4.99, 4.94, 3.10, 1.68, 1.61, 1.57, 1.04–0.99, chain-end groups: 6.57 (m,  $\text{CH}=\text{CH}-\text{CO}_2$ ), 5.43 (m,  $\text{CH}=\text{CH}-\text{CO}_2$ ), 4.61 (broad peak,  $\text{CH}_2-\text{CH}-\text{CH}_2\text{OCOO}$ ), 4.21–3.90 (m,  $\text{CH}_2-\text{CH}-\text{CH}_2\text{OCOO}$  and  $\text{CH}_2-\text{CH}-\text{CH}_2\text{OCOO}$ ) (\* stands for residual solvent resonance).

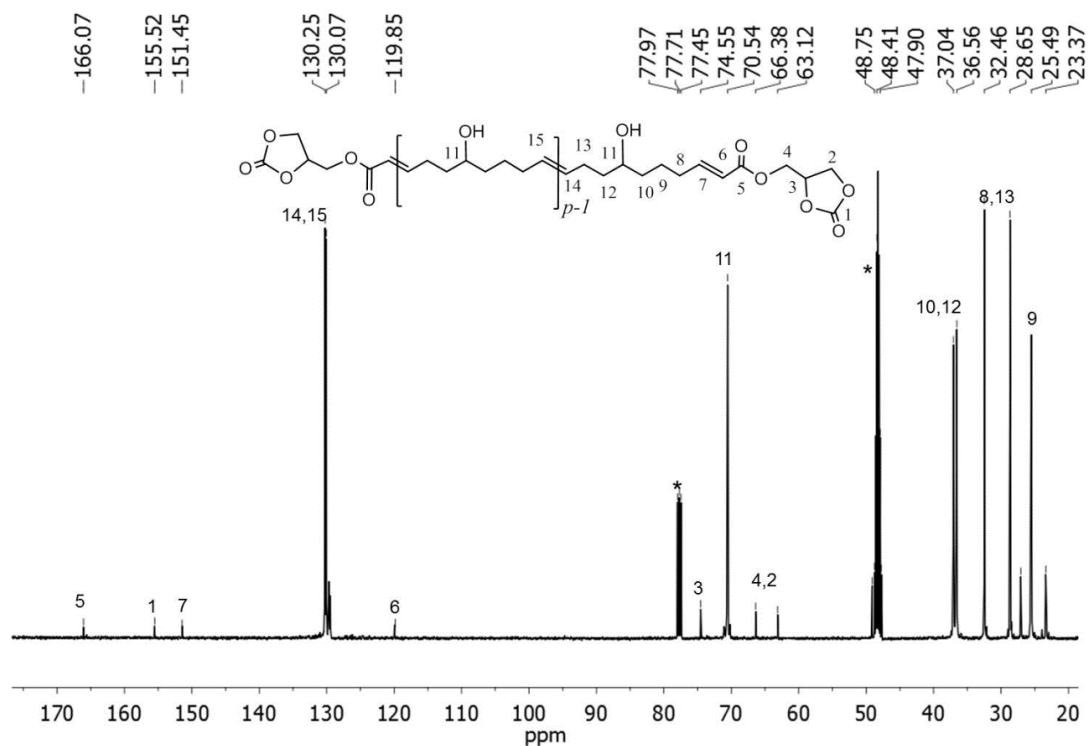

**Figure S28.**  $^{13}\text{C}\{^1\text{H}\}$  NMR spectrum ( $\text{CDCl}_3/\text{CD}_3\text{OD}$ , 100 MHz, 298 K) of an  $\alpha,\omega$ -di(GC)-P(5-OH-COE) prepared from **2** (Table 1, entry 19).  $\delta_{\text{ppm}}$ : repeating unit: 130.2–130.1, 70.5, 37.0, 36.6, 32.5, 28.6, 25.5, 23.4, chain-end groups: 166.1(OC=O), 155.5 (O=COO), 151.4 ( $\text{CH}=\text{CH}-\text{COO}$ ), 119.8 ( $\text{CH}=\text{CH}-\text{COO}$ ), 74.5 ( $\text{CH}_2-\text{CH}-\text{CH}_2\text{OCOO}$ ), 66.4, 63.1 ( $\text{CH}_2-\text{CH}-\text{CH}_2\text{OCOO}$  and  $\text{CH}_2-\text{CH}-\text{CH}_2\text{OCOO}$ ) (\* stands for residual solvent resonance).

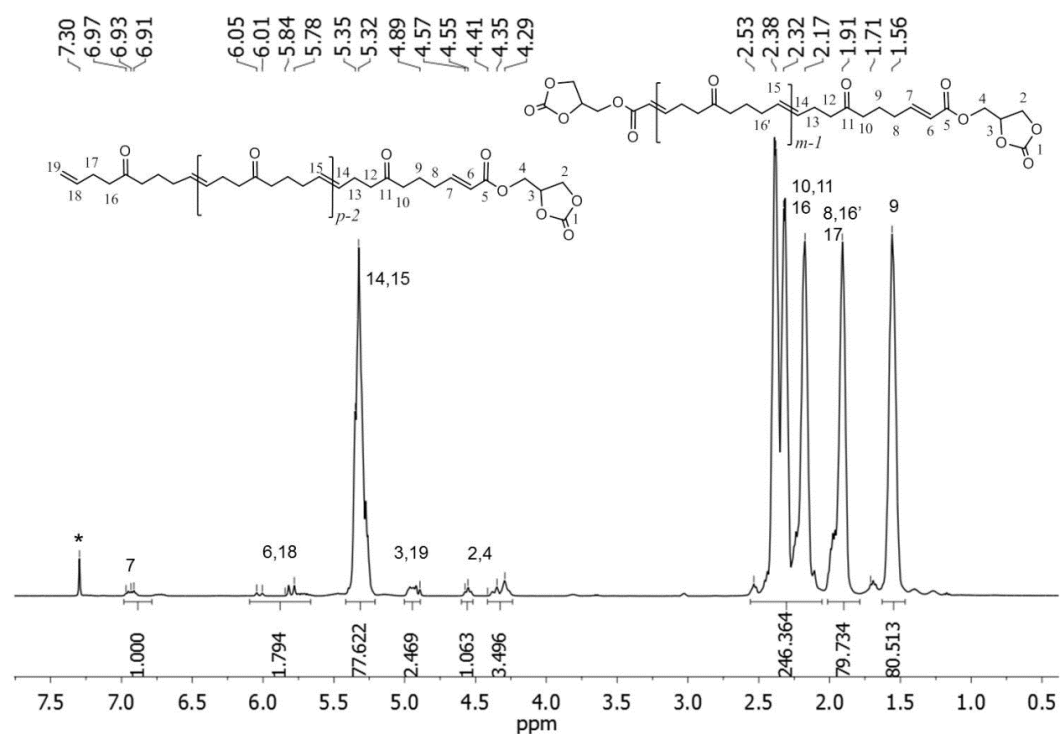

**Figure S29.**  $^1\text{H}$  NMR spectrum ( $\text{CDCl}_3$ , 500 MHz, 298 K) of a mixture of  $\alpha,\omega$ -di(GC)-P(5-O=COE) and  $\alpha$ -GC, $\omega$ -vinyl-P(5-O=COE) prepared from **2** (Table 1, entry 20).  $\delta_{\text{ppm}}$ : repeating unit: 5.35, 5.32, 2.53, 2.38, 2.32, 2.17, 1.91, 1.71, 1.56, chain-end groups: 6.91 (m,  $\text{CH}=\text{CH}-\text{CO}_2$ ), 6.05–5.78 (m,  $\text{CH}=\text{CH}-\text{CO}_2$  and  $\text{CH}_2=\text{CH}-\text{CH}_2$ ), 4.89 (broad signal,  $\text{CH}_2-\text{CH}-\text{CH}_2\text{OCOO}$  and  $\text{CH}_2=\text{CH}-\text{CH}_2$ ), 4.57–4.29 (m,  $\text{CH}_2-\text{CH}-\text{CH}_2\text{OCOO}$  and  $\text{CH}_2-\text{CH}-\text{CH}_2\text{OCOO}$ ) (\* stands for residual solvent resonance).

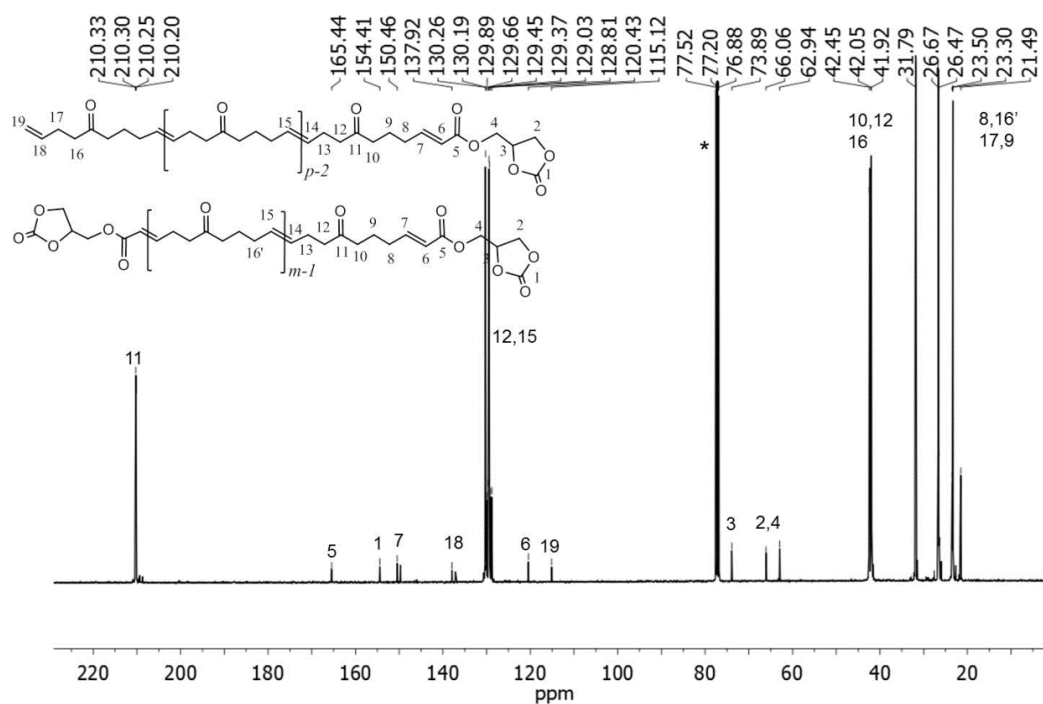

**Figure S30.**  $^{13}\text{C}\{^1\text{H}\}$  NMR spectrum ( $\text{CDCl}_3$ , 100 MHz, 298 K) of a mixture of  $\alpha,\omega$ -di(GC)-P(5-O=COE) and  $\alpha$ -GC, $\omega$ -vinyl-P(5-O=COE) prepared from **2** (Table 1, entry 20).  $\delta_{\text{ppm}}$ : repeating unit: 210.2, 130.3–128.8, 42.4–41.9, 31.8, 26.7, 26.5, 23.5, 23.3, 21.5, chain-end groups: 165.4 (OC=O), 154.4 (O=COO), 150.5 ( $\text{CH}=\text{CH}-\text{COO}$ ), 137.9 ( $\text{CH}_2=\text{CH}-\text{CH}_2$ ), 120.4 ( $\text{CH}=\text{CH}-\text{COO}$ ), 115.1 ( $\text{CH}_2=\text{CH}-\text{CH}_2$ ), 73.9 ( $\text{CH}_2-\text{CH}-\text{CH}_2\text{OCOO}$ ), 66.1, 62.9 ( $\text{CH}_2-\text{CH}-\text{CH}_2\text{OCOO}$  and  $\text{CH}_2-\text{CH}-\text{CH}_2\text{OCOO}$ ) (\* stands for residual solvent resonance).
